# Supplementary material for: Changes in Primary and Secondary Metabolite Levels in Response to Gene Targeting-Mediated Site-Directed Mutagenesis of the Anthranilate Synthase Gene in Rice
Source: PubMed Central journal article supplement (PMC3901229; doi:10.3390/metabo2041123), 2012-12-18
Supplement: metabolites-02-01123-s001.pdf [file metabolites-02-01123-s001.pdf]

## Supplementary:

**Figure S1.** The classification of fold change in signal intensities of peaks detected in extracts prepared from mature seeds, leaves and hulls using LC-MS.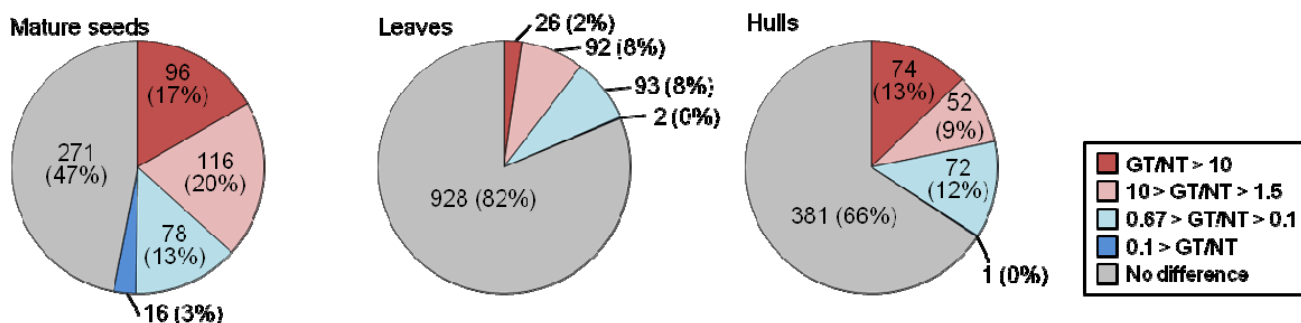**Table S1.** Changes in free amino acid content in mature seeds determined by CE-MS.

| Amino acids | NT (nmol/g) <sup>1</sup> |         | GT (nmol/g) <sup>1</sup> |          | Fold change <sup>2</sup> | P value <sup>3</sup> |
|-------------|--------------------------|---------|--------------------------|----------|--------------------------|----------------------|
| Ala         | 298.4                    | ± 89.8  | 999.4                    | ± 251.9  | 3.35                     | **                   |
| Arg         | 63.3                     | ± 28.5  | 523.2                    | ± 179.0  | 8.27                     | **                   |
| Asn         | 846.3                    | ± 405.1 | 2228.9                   | ± 147.5  | 2.63                     | **                   |
| Asp         | 767.1                    | ± 339.9 | 1192.0                   | ± 182.4  | 1.55                     | *                    |
| Cys         | ND                       |         | 148.4                    | ± 124.5  | -                        | -                    |
| Gln         | 59.0                     | ± 61.0  | 131.8                    | ± 27.7   | 2.23                     | *                    |
| Glu         | 1294.3                   | ± 130.5 | 1101.0                   | ± 221.0  | 0.85                     |                      |
| Gly         | 63.9                     | ± 35.4  | 112.3                    | ± 11.5   | 1.76                     | **                   |
| His         | 104.5                    | ± 57.8  | 235.8                    | ± 77.3   | 2.26                     | **                   |
| Ile         | 11.8                     | ± 2.6   | 25.5                     | ± 2.8    | 2.16                     | **                   |
| Leu         | 11.9                     | ± 3.6   | 24.5                     | ± 2.4    | 2.06                     | **                   |
| Lys         | 19.9                     | ± 7.7   | 190.5                    | ± 84.7   | 9.55                     | **                   |
| Met         | 7.7                      | ± 3.2   | 12.4                     | ± 5.2    | 1.61                     | *                    |
| Phe         | 9.0                      | ± 2.4   | 40.4                     | ± 8.0    | 4.47                     | **                   |
| Pro         | 311.7                    | ± 186.0 | 599.5                    | ± 199.5  | 1.92                     | *                    |
| Ser         | 133.5                    | ± 21.6  | 284.7                    | ± 32.8   | 2.13                     | **                   |
| Thr         | 48.4                     | ± 17.5  | 96.7                     | ± 26.2   | 2.00                     | **                   |
| Trp         | 49.4                     | ± 29.8  | 2842.1                   | ± 1741.3 | 57.59                    | **                   |
| Tyr         | 30.9                     | ± 6.8   | 173.6                    | ± 28.8   | 5.61                     | **                   |
| Val         | 38.3                     | ± 6.6   | 132.9                    | ± 26.3   | 3.47                     | **                   |

<sup>1</sup>Values are mean ± SD ( $n = 6$ ). ND: not-detected. NT: non-transformant. GT: GT plants homozygous for mutated OASA2. <sup>2</sup>Fold change is presented as the ratio of the content of each amino acid in mature seeds of GT to those of NT. <sup>3</sup>Asterisks (\* and \*\*) indicate significant differences between NT and GT at  $P < 0.05$  and  $P < 0.01$ , respectively, as determined by  $t$ -test.

**Table S2.** Changes in anion metabolite levels in mature seeds determined by CE-MS.

| Annotation Name   | Ave m/z  | Signal intensity <sup>1</sup> |   |       |       |   |       | Fold change <sup>1</sup> | P value <sup>2</sup> |
|-------------------|----------|-------------------------------|---|-------|-------|---|-------|--------------------------|----------------------|
|                   |          | NT                            |   |       | GT    |   |       |                          |                      |
| 4-Coumarate       | 163.0395 | 0.003                         | ± | 0.001 | 0.002 | ± | 0.001 | 0.76                     |                      |
| Quinate           | 191.0555 | 0.006                         | ± | 0.000 | 0.006 | ± | 0.001 | 0.98                     |                      |
| Lactate           | 89.02482 | 0.131                         | ± | 0.041 | 0.135 | ± | 0.037 | 1.03                     |                      |
| Benzoate          | 121.0295 | 0.048                         | ± | 0.007 | 0.052 | ± | 0.006 | 1.10                     |                      |
| 2-Furoate         | 111.0091 | 0.000                         | ± | 0.001 | 0.000 | ± | 0.001 | 1.10                     |                      |
| 5-Oxohexanoate    | 129.0557 | 0.003                         | ± | 0.001 | 0.004 | ± | 0.001 | 1.16                     |                      |
| 4-Pyridoxate      | 182.0453 | 0.002                         | ± | 0.001 | 0.003 | ± | 0.001 | 1.19                     |                      |
| 4-Oxovaleric acid | 115.0399 | 0.002                         | ± | 0.001 | 0.003 | ± | 0.002 | 1.20                     |                      |
| Deamino-NAD       | 663.0874 | 0.000                         | ± | 0.000 | 0.000 | ± | 0.001 | 1.27                     |                      |
| NAD               | 662.1028 | 0.003                         | ± | 0.001 | 0.005 | ± | 0.001 | 1.42                     | **                   |
| Pantothenate      | 218.1025 | 0.019                         | ± | 0.007 | 0.032 | ± | 0.009 | 1.65                     | *                    |
| 5-OxoPro          | 128.0352 | 0.047                         | ± | 0.011 | 0.087 | ± | 0.024 | 1.85                     | **                   |
| T6P               | 421.0743 | 0.020                         | ± | 0.006 | 0.039 | ± | 0.005 | 1.94                     | **                   |
| AMP               | 346.0547 | 0.037                         | ± | 0.014 | 0.071 | ± | 0.012 | 1.94                     | **                   |
| F6P;G1P           | 259.0207 | 0.003                         | ± | 0.002 | 0.007 | ± | 0.002 | 1.98                     | **                   |
| Raffinose         | 503.1614 | 0.007                         | ± | 0.004 | 0.017 | ± | 0.006 | 2.27                     | **                   |
| Shikimate         | 173.045  | 0.001                         | ± | 0.002 | 0.003 | ± | 0.001 | 2.36                     | *                    |
| Allantoin         | 157.0362 | 0.323                         | ± | 0.042 | 0.845 | ± | 0.119 | 2.62                     | **                   |
| UMP               | 323.0272 | 0.005                         | ± | 0.003 | 0.014 | ± | 0.003 | 2.62                     | **                   |
| Ferulate          | 193.0507 | 0.001                         | ± | 0.001 | 0.002 | ± | 0.002 | 2.92                     |                      |
| N-Acetyl-b-Ala    | 130.0505 | 0.000                         | ± | 0.001 | 0.001 | ± | 0.001 | 3.49                     |                      |
| Citramalate       | 147.0294 | 0.007                         | ± | 0.006 | 0.026 | ± | 0.016 | 3.54                     | *                    |
| Gluconate         | 195.0503 | 0.048                         | ± | 0.025 | 0.172 | ± | 0.089 | 3.57                     | **                   |
| Glycerate         | 105.0194 | 0.004                         | ± | 0.001 | 0.016 | ± | 0.010 | 3.85                     | *                    |
| Galacturonate     | 193.0322 | 0.001                         | ± | 0.001 | 0.003 | ± | 0.002 | 4.83                     | *                    |
| Hexanoate         | 115.0766 | 0.001                         | ± | 0.001 | 0.004 | ± | 0.002 | 6.80                     | **                   |
| N-acetylSer       | 146.0459 | 0.001                         | ± | 0.001 | 0.004 | ± | 0.001 | 7.40                     | **                   |
| PEA               | 140.0115 | 0.002                         | ± | 0.001 | 0.017 | ± | 0.006 | 8.43                     | **                   |
| HMG               | 161.0449 | 0.002                         | ± | 0.001 | 0.017 | ± | 0.003 | 9.12                     | **                   |
| Allantonate       | 175.0466 | 0.007                         | ± | 0.002 | 0.065 | ± | 0.028 | 9.87                     | **                   |
| AcetylGlu         | 188.0555 | 0.002                         | ± | 0.000 | 0.020 | ± | 0.003 | 11.36                    | **                   |

<sup>1</sup>Anion metabolites annotated and quantified are listed. Signal intensity is presented as mean ± SD ( $n = 6$ ). Fold change is presented as the ratio of each metabolite in mature seeds of GT to the corresponding value in NT. <sup>2</sup>Asterisks (\* and \*\*) indicate significant differences between NT and GT at  $P < 0.05$  and  $P < 0.01$ , respectively, as determined by  $t$ -test.

**Table S3.** Changes in cation metabolite levels in mature seeds determined by CE-MS.

| Annotation Name              | Ave m/z  | Signal intensity |         |        |         | Fold change | P value |
|------------------------------|----------|------------------|---------|--------|---------|-------------|---------|
|                              |          | NT               |         | GT     |         |             |         |
| Trigonelline                 | 138.0518 | 0.009            | ± 0.005 | 0.001  | ± 0.002 | 0.12        | **      |
| GSH                          | 308.0899 | 1.756            | ± 0.319 | 1.026  | ± 0.410 | 0.58        | **      |
| Glucosaminatate              | 196.0806 | 0.047            | ± 0.030 | 0.033  | ± 0.010 | 0.72        |         |
| 2-Amino adipate              | 162.0754 | 0.006            | ± 0.005 | 0.006  | ± 0.007 | 0.97        |         |
| 5-MethylTHF                  | 460.2013 | 0.002            | ± 0.000 | 0.002  | ± 0.001 | 1.00        |         |
| Adenosine                    | 268.1029 | 0.097            | ± 0.047 | 0.099  | ± 0.035 | 1.02        |         |
| Anthranilate                 | 138.0541 | 0.590            | ± 0.090 | 0.668  | ± 0.104 | 1.13        |         |
| 2-MethylSer                  | 120.0650 | 0.030            | ± 0.004 | 0.040  | ± 0.005 | 1.31        | **      |
| 5-Methylcytosine             | 126.0648 | 0.002            | ± 0.001 | 0.003  | ± 0.001 | 1.32        |         |
| Cytosine                     | 112.0502 | 0.005            | ± 0.001 | 0.008  | ± 0.001 | 1.48        | **      |
| Betaine                      | 118.0861 | 0.905            | ± 0.220 | 1.339  | ± 0.354 | 1.48        | *       |
| Stachydrine                  | 144.1015 | 0.044            | ± 0.031 | 0.068  | ± 0.069 | 1.54        |         |
| Thiamine                     | 265.1106 | 0.054            | ± 0.006 | 0.092  | ± 0.012 | 1.71        | **      |
| Carnitine                    | 162.1114 | 0.007            | ± 0.002 | 0.012  | ± 0.010 | 1.73        |         |
| Imidazolw-4-acetate          | 127.0497 | 0.006            | ± 0.001 | 0.010  | ± 0.001 | 1.79        | **      |
| Adenine                      | 136.0614 | 0.010            | ± 0.003 | 0.021  | ± 0.008 | 2.17        | **      |
| Cytidine                     | 244.0917 | 0.006            | ± 0.001 | 0.016  | ± 0.002 | 2.57        | **      |
| Ophthalmate                  | 290.1332 | 0.031            | ± 0.010 | 0.084  | ± 0.038 | 2.71        | **      |
| Pyridoxamine5P               | 249.0640 | 0.001            | ± 0.002 | 0.004  | ± 0.000 | 2.78        | **      |
| GSSG                         | 613.1607 | 0.027            | ± 0.007 | 0.078  | ± 0.012 | 2.83        | **      |
| 3-MethylHis                  | 170.0912 | 0.023            | ± 0.007 | 0.066  | ± 0.008 | 2.86        | **      |
| HydroxyPro                   | 132.0647 | 0.014            | ± 0.007 | 0.046  | ± 0.017 | 3.16        | **      |
| Nicotinate                   | 124.0388 | 0.013            | ± 0.002 | 0.043  | ± 0.007 | 3.38        | **      |
| Citrulline                   | 176.1025 | 0.003            | ± 0.005 | 0.011  | ± 0.013 | 3.46        |         |
| Nicotinamide;Isonicotinamide | 123.0547 | 0.004            | ± 0.004 | 0.016  | ± 0.003 | 3.64        | **      |
| Pyridoxamine                 | 169.0971 | 0.002            | ± 0.002 | 0.008  | ± 0.003 | 4.10        | **      |
| g-Guanidinobutyrate          | 146.0917 | 0.037            | ± 0.005 | 0.158  | ± 0.113 | 4.27        | *       |
| b-Ala                        | 90.0551  | 0.041            | ± 0.013 | 0.180  | ± 0.076 | 4.38        | **      |
| Guanosine                    | 284.0977 | 0.013            | ± 0.002 | 0.061  | ± 0.008 | 4.81        | **      |
| Choline                      | 104.1071 | 0.798            | ± 0.288 | 4.743  | ± 1.121 | 5.94        | **      |
| Pipecolate                   | 130.0857 | 0.017            | ± 0.004 | 0.119  | ± 0.037 | 6.98        | **      |
| GABA                         | 104.0703 | 0.158            | ± 0.067 | 1.138  | ± 0.419 | 7.19        | **      |
| 2-Aminobutyrate              | 104.0702 | 0.011            | ± 0.009 | 0.094  | ± 0.006 | 8.38        | **      |
| Agmatine                     | 131.1284 | 0.001            | ± 0.002 | 0.011  | ± 0.005 | 8.82        | **      |
| Guanine                      | 152.0562 | 0.000            | ± 0.001 | 0.003  | ± 0.001 | 10.01       | **      |
| Serotonin                    | 177.1015 | 0.003            | ± 0.004 | 0.035  | ± 0.030 | 11.26       | *       |
| Ornithine                    | 133.0969 | 0.002            | ± 0.003 | 0.034  | ± 0.013 | 16.16       | **      |
| SAH                          | 385.1276 | 0.000            | ± 0.001 | 0.009  | ± 0.003 | 40.50       | **      |
| Cys-GSSG                     | 427.0944 | 0.000            | ± 0.001 | 0.051  | ± 0.023 | 170.81      | **      |
| Trp (dimer)                  | 409.1919 | 0.002            | ± 0.002 | 10.012 | ± 1.376 | 6619.06     | **      |

<sup>1</sup>Anion metabolites annotated and quantified are listed. Signal intensity is presented as mean ± SD ( $n = 6$ ). Fold change is presented as the ratio of each metabolite in mature seeds of GT to the corresponding value in NT. <sup>2</sup>Asterisks (\* and \*\*) indicate significant differences between NT and GT at  $P < 0.05$  and  $P < 0.01$ , respectively, as determined by  $t$ -test.

**Table S4.** Untargeted negatively charged metabolic profiles in mature seeds detected by LC-MS.

| Peak number | Retention time (min) | Mass number (m/z) | Signal intensity <sup>1</sup> |   |       |       |   |       | Fold Change <sup>2</sup> |
|-------------|----------------------|-------------------|-------------------------------|---|-------|-------|---|-------|--------------------------|
|             |                      |                   | NT                            |   |       | GT    |   |       |                          |
| 10057       | 4.23                 | 1179              | 0.184                         | ± | 0.108 | 0.003 | ± | 0.000 | 0.01                     |
| 9610        | 3.01                 | 1102              | 0.091                         | ± | 0.097 | 0.003 | ± | 0.000 | 0.03                     |
| 4793        | 3.49                 | 614               | 0.077                         | ± | 0.048 | 0.003 | ± | 0.000 | 0.04                     |
| 8237        | 4.43                 | 885               | 0.191                         | ± | 0.077 | 0.009 | ± | 0.014 | 0.05                     |
| 7993        | 3.08                 | 856               | 0.106                         | ± | 0.104 | 0.005 | ± | 0.006 | 0.05                     |
| 7830        | 3.29                 | 841               | 0.107                         | ± | 0.070 | 0.006 | ± | 0.009 | 0.06                     |
| 7685        | 4.90                 | 827               | 0.099                         | ± | 0.061 | 0.006 | ± | 0.008 | 0.06                     |
| 8239        | 5.08                 | 885               | 0.056                         | ± | 0.021 | 0.003 | ± | 0.001 | 0.06                     |
| 7975        | 2.32                 | 855               | 0.111                         | ± | 0.084 | 0.007 | ± | 0.010 | 0.06                     |
| 8919        | 3.12                 | 985               | 0.126                         | ± | 0.090 | 0.009 | ± | 0.010 | 0.07                     |
| 5508        | 2.11                 | 664               | 0.140                         | ± | 0.079 | 0.010 | ± | 0.005 | 0.07                     |
| 9651        | 2.97                 | 1109              | 0.135                         | ± | 0.091 | 0.013 | ± | 0.012 | 0.09                     |
| 2057        | 3.60                 | 382               | 0.051                         | ± | 0.015 | 0.522 | ± | 0.128 | 10.22                    |
| 5233        | 2.09                 | 647               | 0.007                         | ± | 0.005 | 0.072 | ± | 0.019 | 10.37                    |
| 4218        | 3.20                 | 571               | 0.013                         | ± | 0.011 | 0.152 | ± | 0.079 | 12.11                    |
| 2974        | 2.76                 | 472               | 0.009                         | ± | 0.014 | 0.123 | ± | 0.036 | 13.95                    |
| 3645        | 2.80                 | 527               | 0.008                         | ± | 0.009 | 0.124 | ± | 0.021 | 14.81                    |
| 1135        | 4.53                 | 283               | 0.003                         | ± | 0.000 | 0.065 | ± | 0.011 | 21.20                    |
| 3885        | 3.47                 | 545               | 0.009                         | ± | 0.007 | 0.220 | ± | 0.084 | 23.42                    |
| 1870        | 3.52                 | 365               | 0.006                         | ± | 0.007 | 0.143 | ± | 0.051 | 24.89                    |
| 5839        | 4.99                 | 683               | 0.003                         | ± | 0.000 | 0.078 | ± | 0.029 | 25.53                    |
| 3829        | 3.96                 | 541               | 0.003                         | ± | 0.001 | 0.092 | ± | 0.036 | 27.07                    |
| 4993        | 4.31                 | 627               | 0.003                         | ± | 0.000 | 0.084 | ± | 0.019 | 27.61                    |
| 1389        | 4.96                 | 316               | 0.004                         | ± | 0.001 | 0.110 | ± | 0.010 | 30.91                    |
| 3539        | 5.65                 | 518               | 0.003                         | ± | 0.000 | 0.097 | ± | 0.018 | 31.94                    |
| 4023        | 4.93                 | 554               | 0.003                         | ± | 0.000 | 0.100 | ± | 0.029 | 32.83                    |
| 7199        | 2.11                 | 784               | 0.003                         | ± | 0.000 | 0.100 | ± | 0.012 | 32.87                    |
| 1238        | 4.60                 | 297               | 0.003                         | ± | 0.000 | 0.100 | ± | 0.025 | 32.88                    |
| 8310        | 4.91                 | 894               | 0.005                         | ± | 0.005 | 0.169 | ± | 0.070 | 33.24                    |
| 4752        | 2.69                 | 611               | 0.003                         | ± | 0.000 | 0.103 | ± | 0.021 | 33.73                    |
| 8572        | 3.54                 | 926               | 0.003                         | ± | 0.000 | 0.106 | ± | 0.041 | 34.65                    |
| 1270        | 4.50                 | 302               | 0.003                         | ± | 0.000 | 0.106 | ± | 0.018 | 34.67                    |
| 1786        | 3.49                 | 356               | 0.003                         | ± | 0.000 | 0.127 | ± | 0.027 | 41.56                    |
| 406         | 3.70                 | 171               | 0.003                         | ± | 0.000 | 0.131 | ± | 0.013 | 43.10                    |
| 1364        | 4.64                 | 314               | 0.003                         | ± | 0.000 | 0.133 | ± | 0.020 | 43.53                    |
| 3870        | 3.40                 | 544               | 0.016                         | ± | 0.010 | 0.803 | ± | 0.293 | 50.34                    |
| 7277        | 4.14                 | 791               | 0.003                         | ± | 0.000 | 0.162 | ± | 0.032 | 53.22                    |
| 4611        | 3.64                 | 601               | 0.003                         | ± | 0.000 | 0.174 | ± | 0.043 | 57.26                    |
| 4874        | 3.23                 | 619               | 0.003                         | ± | 0.000 | 0.182 | ± | 0.049 | 59.72                    |
| 3869        | 3.27                 | 544               | 0.010                         | ± | 0.008 | 0.576 | ± | 0.221 | 60.51                    |
| 1362        | 3.85                 | 314               | 0.009                         | ± | 0.004 | 0.552 | ± | 0.061 | 61.22                    |
| 603         | 5.01                 | 204               | 0.003                         | ± | 0.000 | 0.191 | ± | 0.155 | 62.75                    |

Table S4. Cont.

| Peak number | Retention time (min) | Mass number (m/z) | Signal intensity <sup>1</sup> |   |       |       |   |       | Fold Change <sup>2</sup> |
|-------------|----------------------|-------------------|-------------------------------|---|-------|-------|---|-------|--------------------------|
|             |                      |                   | NT                            |   |       | GT    |   |       |                          |
| 7917        | 2.23                 | 849               | 0.005                         | ± | 0.004 | 0.362 | ± | 0.061 | 67.48                    |
| 6100        | 4.26                 | 700               | 0.003                         | ± | 0.000 | 0.206 | ± | 0.075 | 67.71                    |
| 1555        | 3.87                 | 332               | 0.026                         | ± | 0.012 | 1.791 | ± | 0.310 | 70.03                    |
| 4021        | 4.70                 | 554               | 0.003                         | ± | 0.000 | 0.250 | ± | 0.072 | 82.16                    |
| 9141        | 2.96                 | 1019              | 0.004                         | ± | 0.002 | 0.389 | ± | 0.040 | 88.41                    |
| 5692        | 4.21                 | 674               | 0.003                         | ± | 0.000 | 0.283 | ± | 0.053 | 92.87                    |
| 4209        | 3.64                 | 570               | 0.003                         | ± | 0.000 | 0.315 | ± | 0.177 | 103.37                   |
| 7357        | 3.57                 | 797               | 0.003                         | ± | 0.001 | 0.353 | ± | 0.105 | 104.29                   |
| 6329        | 3.12                 | 716               | 0.003                         | ± | 0.000 | 0.357 | ± | 0.147 | 117.21                   |
| 1418        | 3.15                 | 319               | 0.004                         | ± | 0.002 | 0.544 | ± | 0.109 | 133.96                   |
| 8868        | 3.34                 | 977               | 0.003                         | ± | 0.000 | 0.489 | ± | 0.161 | 160.47                   |
| 2148        | 5.21                 | 389               | 0.003                         | ± | 0.000 | 0.738 | ± | 0.224 | 242.51                   |
| 4022        | 4.82                 | 554               | 0.003                         | ± | 0.000 | 0.973 | ± | 0.283 | 319.60                   |
| 2335        | 3.00                 | 407               | 0.014                         | ± | 0.003 | 4.766 | ± | 0.238 | 334.46                   |
| 7907        | 2.16                 | 848               | 0.003                         | ± | 0.000 | 1.259 | ± | 0.229 | 391.38                   |

<sup>1</sup>Signal intensity is presented as mean ± SD ( $n = 6$ ). <sup>2</sup>Fold change is presented as the ratio of each peak in mature seeds of GT to the corresponding value in NT. Listed here are peaks with fold changes of over 10 or under 0.1 (significant difference between NT and GT at  $P < 0.05$  as determined by  $t$ -test).

**Table S5.** Untargeted positively charged metabolic profiles in mature seeds detected by LC-MS.

| Peak number | Retention time (min) | Mass number (m/z) | Signal intensity <sup>1</sup> |   |       |       |   |       | Fold Change <sup>2</sup> |
|-------------|----------------------|-------------------|-------------------------------|---|-------|-------|---|-------|--------------------------|
|             |                      |                   | NT                            |   |       | GT    |   |       |                          |
| 10529       | 5.33                 | 1019              | 0.094                         | ± | 0.071 | 0.002 | ± | 0.000 | 0.02                     |
| 8588        | 4.30                 | 798               | 0.056                         | ± | 0.033 | 0.002 | ± | 0.000 | 0.03                     |
| 9307        | 3.08                 | 858               | 0.056                         | ± | 0.048 | 0.003 | ± | 0.003 | 0.06                     |
| 6125        | 4.06                 | 653               | 0.035                         | ± | 0.008 | 0.002 | ± | 0.000 | 0.06                     |
| 1733        | 4.79                 | 321               | 0.011                         | ± | 0.005 | 0.149 | ± | 0.020 | 13.88                    |
| 6834        | 2.02                 | 692               | 0.003                         | ± | 0.002 | 0.058 | ± | 0.013 | 17.47                    |
| 3594        | 2.82                 | 461               | 0.005                         | ± | 0.002 | 0.092 | ± | 0.014 | 20.25                    |
| 661         | 4.93                 | 204               | 0.008                         | ± | 0.008 | 0.167 | ± | 0.105 | 21.28                    |
| 784         | 3.70                 | 217               | 0.034                         | ± | 0.019 | 0.721 | ± | 0.044 | 21.47                    |
| 4242        | 5.12                 | 520               | 0.002                         | ± | 0.000 | 0.042 | ± | 0.009 | 21.79                    |
| 1940        | 3.89                 | 334               | 0.103                         | ± | 0.061 | 2.374 | ± | 0.257 | 23.10                    |
| 3426        | 2.68                 | 447               | 0.002                         | ± | 0.000 | 0.051 | ± | 0.011 | 26.41                    |
| 858         | 2.72                 | 225               | 0.003                         | ± | 0.002 | 0.073 | ± | 0.009 | 27.18                    |
| 5917        | 5.08                 | 642               | 0.002                         | ± | 0.000 | 0.053 | ± | 0.010 | 27.50                    |
| 1594        | 3.32                 | 307               | 0.002                         | ± | 0.000 | 0.053 | ± | 0.009 | 27.50                    |
| 4688        | 4.38                 | 557               | 0.002                         | ± | 0.000 | 0.056 | ± | 0.016 | 28.73                    |
| 4734        | 4.12                 | 561               | 0.002                         | ± | 0.000 | 0.065 | ± | 0.012 | 33.66                    |
| 10711       | 4.74                 | 1046              | 0.003                         | ± | 0.002 | 0.095 | ± | 0.024 | 33.86                    |
| 1732        | 4.52                 | 321               | 0.002                         | ± | 0.000 | 0.070 | ± | 0.011 | 34.01*                   |
| 5491        | 3.71                 | 614               | 0.002                         | ± | 0.000 | 0.072 | ± | 0.027 | 37.07                    |
| 2872        | 5.26                 | 395               | 0.002                         | ± | 0.000 | 0.072 | ± | 0.015 | 37.11                    |

Table S5. Cont.

| Peak number | Retention time (min) | Mass number (m/z) | Signal intensity <sup>1</sup> |   |       |       |   |       | Fold Change <sup>2</sup> |
|-------------|----------------------|-------------------|-------------------------------|---|-------|-------|---|-------|--------------------------|
|             |                      |                   | NT                            |   |       | GT    |   |       |                          |
| 1678        | 4.66                 | 316               | 0.002                         | ± | 0.000 | 0.074 | ± | 0.010 | 38.11                    |
| 6707        | 4.99                 | 685               | 0.002                         | ± | 0.000 | 0.077 | ± | 0.027 | 39.57                    |
| 4671        | 4.50                 | 556               | 0.002                         | ± | 0.000 | 0.082 | ± | 0.020 | 42.53                    |
| 2440        | 3.28                 | 366               | 0.002                         | ± | 0.000 | 0.087 | ± | 0.037 | 44.77                    |
| 5074        | 2.60                 | 588               | 0.003                         | ± | 0.002 | 0.149 | ± | 0.061 | 51.43                    |
| 4243        | 5.66                 | 520               | 0.002                         | ± | 0.000 | 0.103 | ± | 0.020 | 53.10                    |
| 4384        | 3.44                 | 532               | 0.002                         | ± | 0.000 | 0.117 | ± | 0.044 | 60.20                    |
| 8353        | 3.84                 | 779               | 0.008                         | ± | 0.009 | 0.491 | ± | 0.152 | 62.29                    |
| 6212        | 3.98                 | 659               | 0.002                         | ± | 0.000 | 0.153 | ± | 0.028 | 79.10                    |
| 7049        | 4.27                 | 702               | 0.002                         | ± | 0.000 | 0.161 | ± | 0.059 | 83.24                    |
| 5277        | 3.66                 | 603               | 0.002                         | ± | 0.000 | 0.173 | ± | 0.049 | 89.16                    |
| 3619        | 4.01                 | 463               | 0.002                         | ± | 0.000 | 0.180 | ± | 0.032 | 93.08                    |
| 3023        | 4.60                 | 407               | 0.002                         | ± | 0.001 | 0.233 | ± | 0.088 | 98.44                    |
| 4344        | 2.92                 | 529               | 0.002                         | ± | 0.000 | 0.204 | ± | 0.021 | 105.28                   |
| 4674        | 4.93                 | 556               | 0.002                         | ± | 0.000 | 0.220 | ± | 0.073 | 113.82                   |
| 10255       | 3.35                 | 979               | 0.002                         | ± | 0.000 | 0.223 | ± | 0.084 | 115.26                   |
| 4889        | 3.66                 | 573               | 0.002                         | ± | 0.000 | 0.227 | ± | 0.129 | 117.09                   |
| 4343        | 2.85                 | 529               | 0.002                         | ± | 0.000 | 0.231 | ± | 0.026 | 119.32                   |
| 2926        | 3.57                 | 400               | 0.002                         | ± | 0.000 | 0.241 | ± | 0.062 | 124.62                   |
| 1722        | 3.73                 | 320               | 0.002                         | ± | 0.001 | 0.301 | ± | 0.053 | 133.45                   |
| 6206        | 2.28                 | 659               | 0.002                         | ± | 0.000 | 0.262 | ± | 0.114 | 135.33                   |
| 6194        | 3.42                 | 658               | 0.002                         | ± | 0.000 | 0.285 | ± | 0.104 | 147.30                   |
| 1305        | 3.48                 | 277               | 0.002                         | ± | 0.000 | 0.299 | ± | 0.042 | 154.50                   |
| 10552       | 3.11                 | 1022              | 0.002                         | ± | 0.000 | 0.316 | ± | 0.024 | 163.37                   |
| 2262        | 4.19                 | 354               | 0.002                         | ± | 0.000 | 0.317 | ± | 0.050 | 163.93                   |
| 2456        | 2.99                 | 367               | 0.002                         | ± | 0.000 | 0.324 | ± | 0.123 | 167.55                   |
| 3043        | 3.17                 | 410               | 0.005                         | ± | 0.004 | 0.779 | ± | 0.051 | 171.98                   |
| 4672        | 4.70                 | 556               | 0.002                         | ± | 0.000 | 0.339 | ± | 0.117 | 174.97                   |
| 3925        | 3.63                 | 493               | 0.002                         | ± | 0.000 | 0.387 | ± | 0.106 | 199.64                   |
| 8838        | 3.02                 | 818               | 0.002                         | ± | 0.000 | 0.508 | ± | 0.037 | 262.60                   |
| 2817        | 5.23                 | 391               | 0.003                         | ± | 0.003 | 1.044 | ± | 0.234 | 336.45                   |
| 4870        | 3.61                 | 572               | 0.002                         | ± | 0.000 | 0.667 | ± | 0.357 | 344.61                   |
| 4673        | 4.82                 | 556               | 0.003                         | ± | 0.004 | 1.371 | ± | 0.410 | 397.02                   |
| 9212        | 2.17                 | 850               | 0.002                         | ± | 0.000 | 0.800 | ± | 0.243 | 412.99                   |

Details as in Table S4. An asterisk (\*) in the Fold change row indicates annotation as 5'-deoxy-5'-methylthioadenosine
